# Supplementary material
Source: ML conference proceedings conference paper supplement (https://proceedings.mlr.press/v51/vandemeent16.html)
Supplement: Supplementary file 1 [file vandemeent16-supp.pdf]

---

# Supplemental Material for Black-Box Policy Search with Probabilistic Programs

---

Jan-Willem van de Meent   Brooks Paige   David Tolpin   Frank Wood  
Department of Engineering Science, University of Oxford

## A Anglican

All case studies are implemented in Anglican, a probabilistic programming language that is closely integrated into the Clojure language. In Anglican, the macro `defquery` is used to define a probabilistic model. Programs may make use of user-written Clojure functions (defined with `defn`) as well as user-written Anglican functions (defined with `defm`). The difference between the two is that in Anglican functions may make use of the model special forms `sample`, `observe`, and `predict`, which interrupt execution and require action by the inference back end. In Clojure functions, `sample` is a primitive procedure that generates a random value, `observe` returns a log probability, and `predict` is not available.

Full documentation for Anglican can be found at

<http://www.robots.ox.ac.uk/~fwood/anglican>

The complete source code for the case studies can be found at

<https://bitbucket.org/probprog/black-box-policy-search>

## B Canadian Traveler Problem

The complete results for the Canadian traveler problem, showing the performance and convergence for the learned policies for multiple graphs of different sizes and topologies, are presented in Figures 1 and 2.

## C RockSample

The RockSample problem was formulated as a benchmark for value iteration algorithms and is normally evaluated in an infinite horizon setting where the discount factor penalizes sensing and movement. In the original formulation of the problem, movement and sensing incur no cost. The agent gets a reward of 10 for each good rock, as well as for reaching the right edge, but incurs a penalty of -10 when sampling a bad rock.

Here we consider an adaptation of RockSample to a finite horizon setting. We assume sensing is free, and movement incurs a cost of -1. We structure the policy by moving along rocks in a left-to-right order. At each rock the agent sense the closest next rock and chooses to move to it, or discard it and consider the next closest rock. When the agent gets to a rock, it only samples the rock if the rock is good. The parameters describe the prior over the probability of moving to a rock conditioned on the current location and the sensor reading.

## D Guess Who

In Table 1 we provide as reference the complete ontology for the Guess Who domain. At each turn, the player asks whether the unknown individual has a particular value of a single attribute.

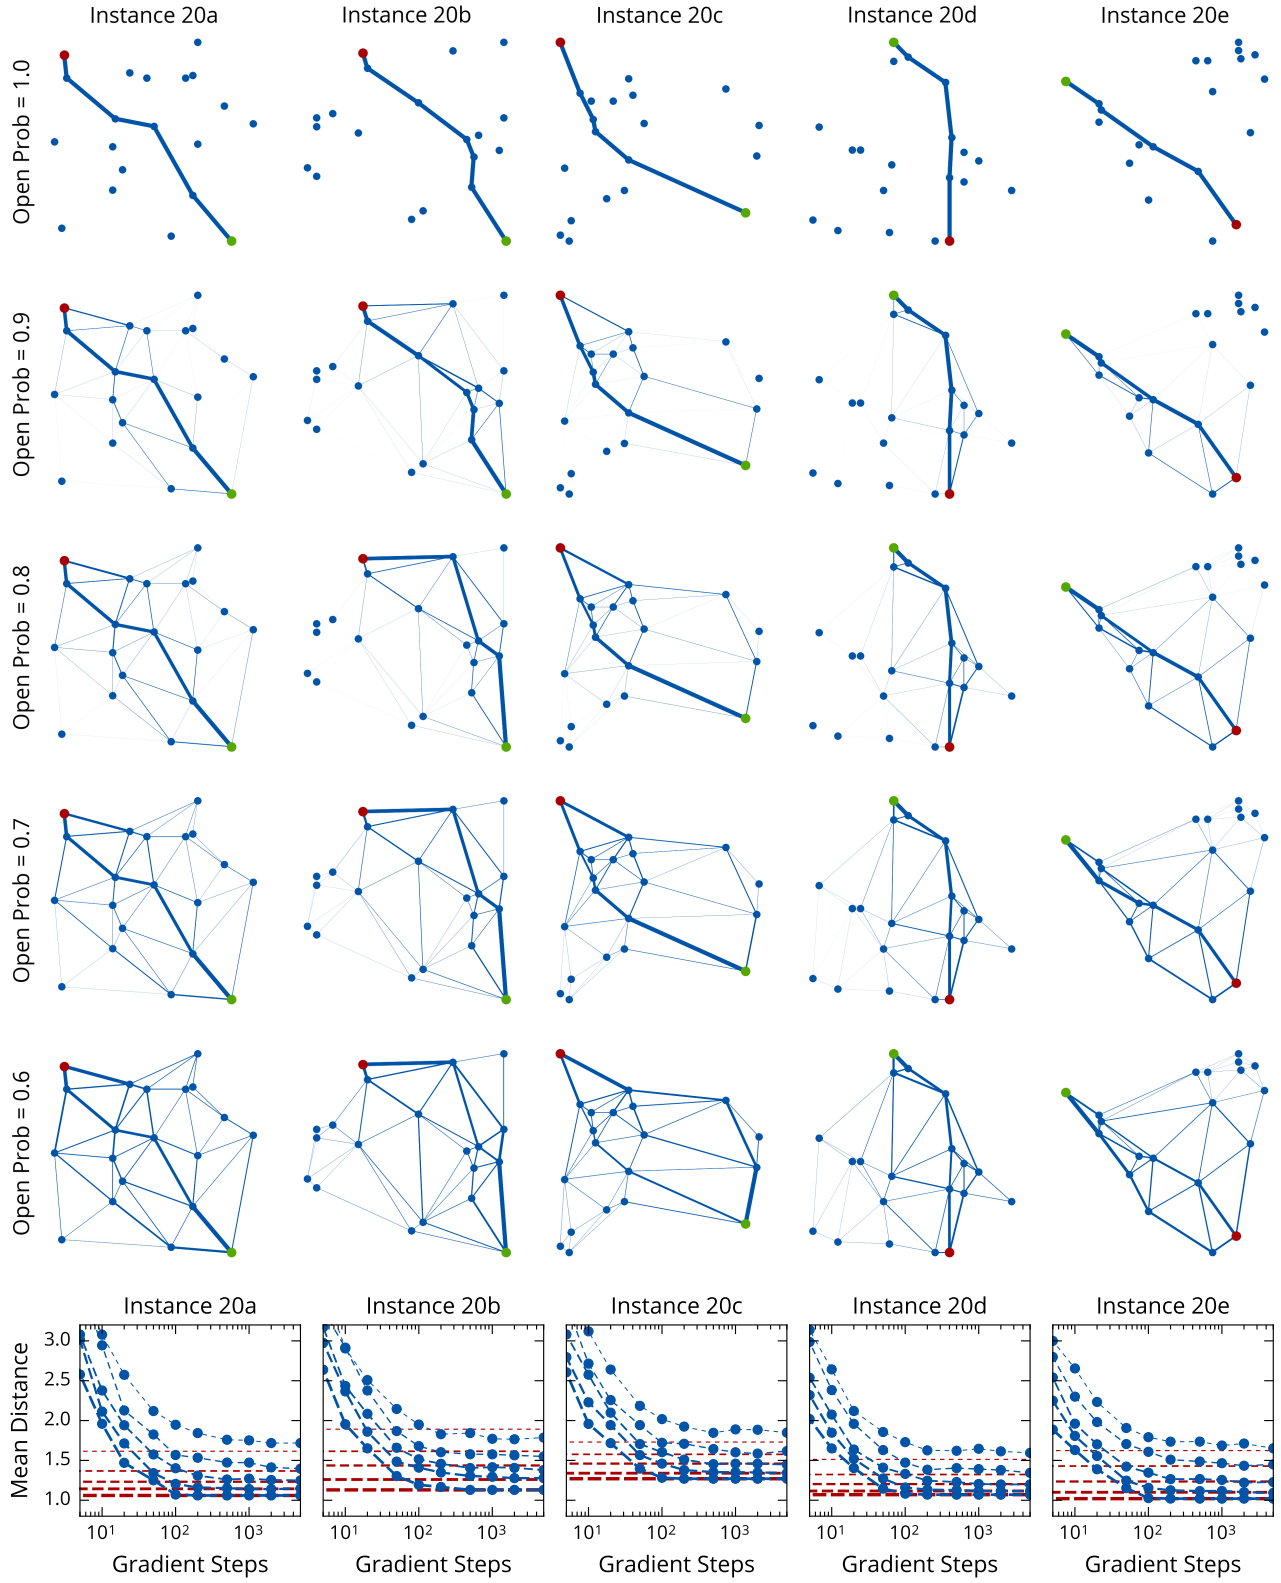

Figure 1: Canadian traveler problem: edge weights, indicating average travel frequency under the learned policy, and convergence for individual instances with 20 nodes.

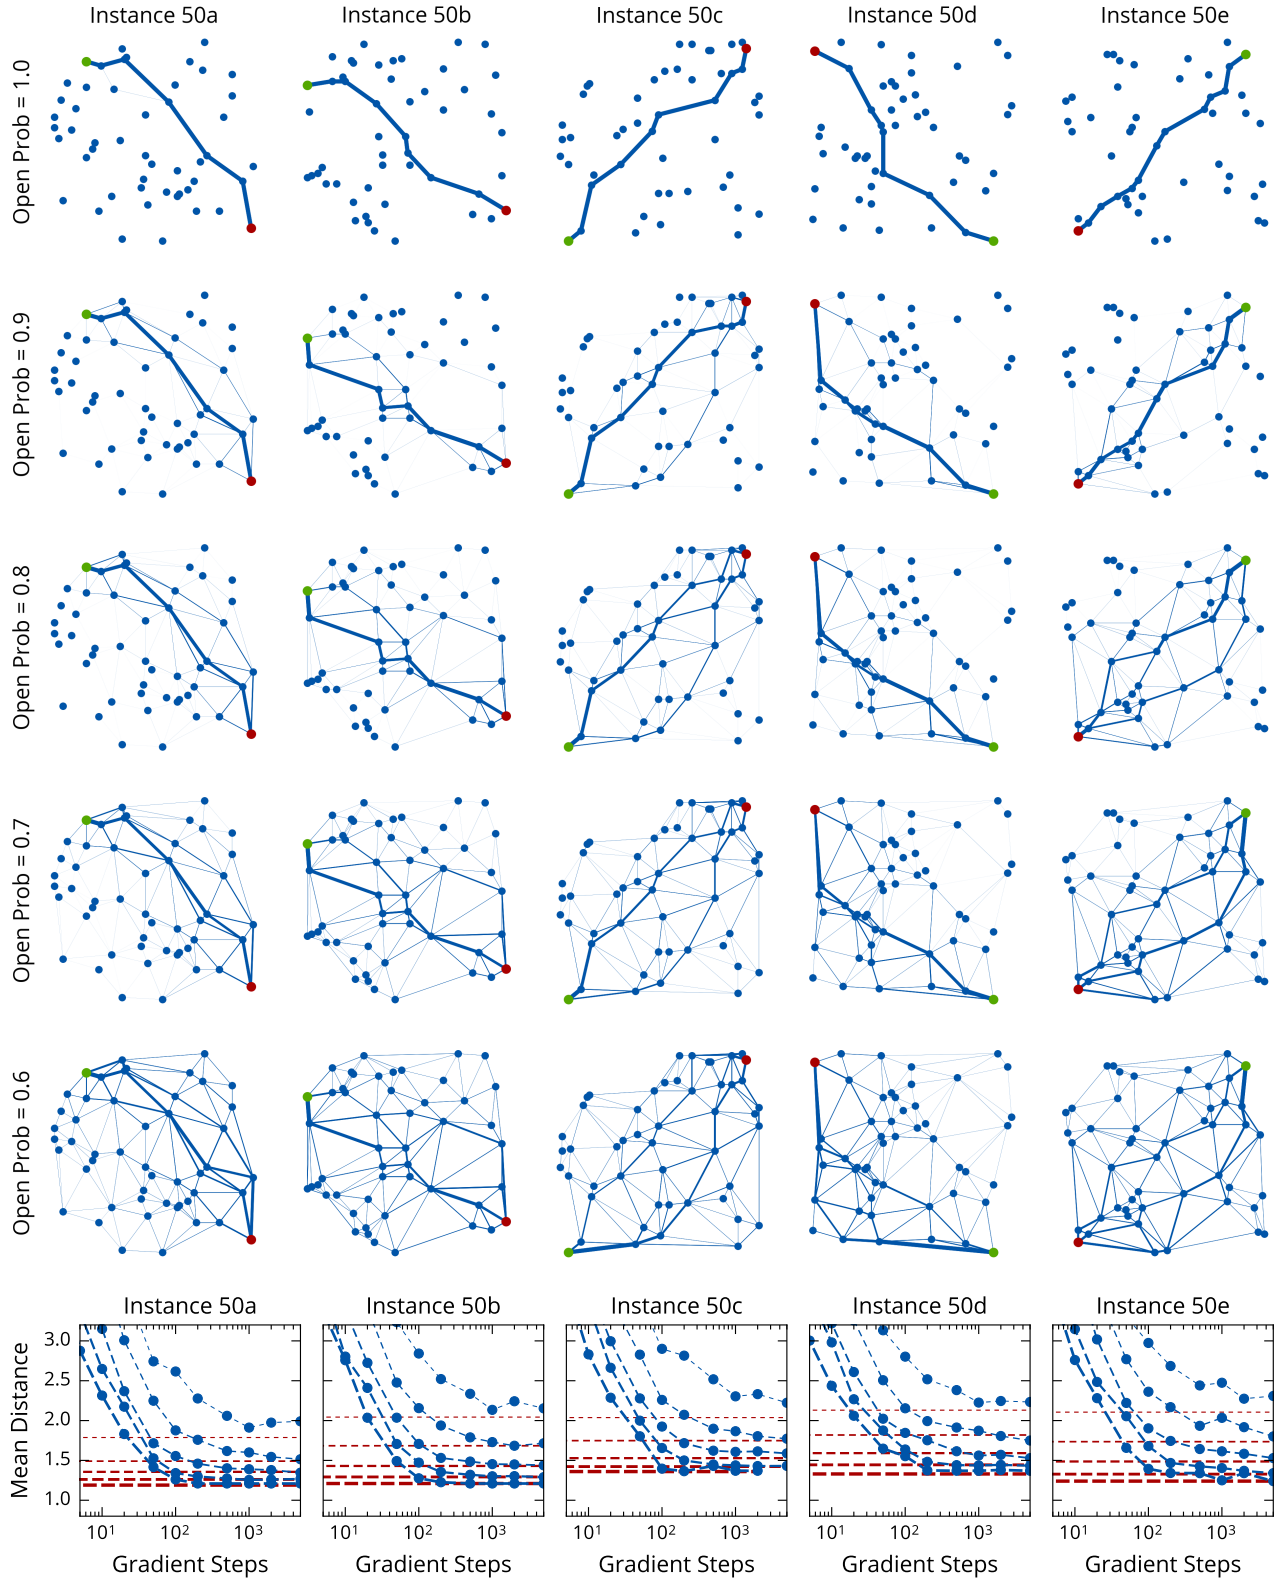

Figure 2: Canadian traveler problem: edge weights, indicating average travel frequency under the learned policy, and convergence for individual instances with 50 nodes.

| id      | beard | ear-rings | eye-color | gender | glasses | hair-color | hair-length | hair-type | hat   | mustache | mouth-size | nose-size | red-cheeks |
|---------|-------|-----------|-----------|--------|---------|------------|-------------|-----------|-------|----------|------------|-----------|------------|
| alex    | false | false     | brown     | male   | false   | black      | short       | straight  | false | true     | large      | small     | false      |
| alfred  | false | false     | blue      | male   | false   | ginger     | long        | straight  | false | true     | small      | small     | false      |
| anita   | false | false     | blue      | female | false   | blonde     | long        | straight  | false | false    | small      | small     | true       |
| anne    | false | true      | brown     | female | false   | black      | short       | curly     | false | false    | small      | large     | false      |
| bernard | false | false     | brown     | male   | false   | brown      | short       | straight  | true  | false    | small      | large     | false      |
| bill    | true  | false     | brown     | male   | false   | ginger     | bald        | straight  | false | false    | small      | small     | true       |
| charles | false | false     | brown     | male   | false   | blonde     | short       | straight  | false | true     | large      | small     | false      |
| claire  | false | false     | brown     | female | true    | ginger     | short       | straight  | true  | false    | small      | small     | false      |
| david   | true  | false     | brown     | male   | false   | blonde     | short       | straight  | false | false    | large      | small     | false      |
| eric    | false | false     | brown     | male   | false   | blonde     | short       | straight  | true  | false    | large      | small     | false      |
| frans   | false | false     | brown     | male   | false   | ginger     | short       | curly     | false | false    | small      | small     | false      |
| george  | false | false     | brown     | male   | false   | white      | short       | straight  | true  | false    | large      | small     | false      |
| herman  | false | false     | brown     | male   | false   | ginger     | bald        | curly     | false | false    | small      | large     | false      |
| joe     | false | false     | brown     | male   | true    | blonde     | short       | curly     | false | false    | small      | small     | false      |
| maria   | false | true      | brown     | female | false   | brown      | long        | straight  | true  | false    | small      | small     | false      |
| max     | false | false     | brown     | male   | false   | black      | short       | curly     | false | true     | large      | large     | false      |
| paul    | false | false     | brown     | male   | true    | white      | short       | straight  | false | false    | small      | small     | false      |
| peter   | false | false     | blue      | male   | false   | white      | short       | straight  | false | false    | large      | large     | false      |
| philip  | true  | false     | brown     | male   | false   | black      | short       | curly     | false | false    | large      | small     | true       |
| richard | true  | false     | brown     | male   | false   | brown      | bald        | straight  | false | true     | small      | small     | false      |
| robert  | false | false     | blue      | male   | false   | brown      | short       | straight  | false | false    | small      | large     | true       |
| sam     | false | false     | brown     | male   | true    | white      | bald        | straight  | false | false    | small      | small     | false      |
| susan   | false | false     | brown     | female | false   | white      | long        | straight  | false | false    | large      | small     | true       |
| tom     | false | false     | blue      | male   | true    | black      | bald        | straight  | false | false    | small      | small     | false      |

Table 1: Ontology for the Guess Who domain, consisting of 24 individuals, characterized by 11 binary attributes and two multi-class attributes.
